# Supplementary material for: SARS-CoV-2 D614G Variant Exhibits Enhanced Replication ex vivo and Earlier Transmission in vivo
Source: PubMed Central journal article supplement — bioRxiv. 2020 Sep 29:2020.09.28.317685. Preprint. [Version 1] doi: 10.1101/2020.09.28.317685 (PMC7536872; doi:10.1101/2020.09.28.317685), 2020-09-29

579 **Figure S1. Additional data of WT and D614G infected primary human airway epithelial**  
580 **cells.** A. Growth curves of the two viruses in individual primary nasal (i), large airway (ii) and  
581 small airway (iii) epithelial cells relating to Fig 1 D to F, MOI = 0.1; plaque assay detection limit:  
582  $1.7 \log_{10}$ PFU/mL. B. comparison of WT and D614G titer at 96h on HNE, LAE and SAE. C.  
583 Whole-mount staining of WT and D614G infected LAE cultures, blue: Hoechst (nuclei), red:  
584 phalloidin (F-actin), white: cilia ( $\alpha$ -tubulin); yellow: MUC5AC, Green: SARS-CoV-2 N protein,  
585 scale bar: 50 $\mu$ m.

586

587 **Figure S2. Experimental design of hamster transmission study.** A, Timeline of nasal wash  
588 sampling from infected and exposed animals. B. Image of hamsters in the cage in transmission  
589 study.

# Figure S1

## A

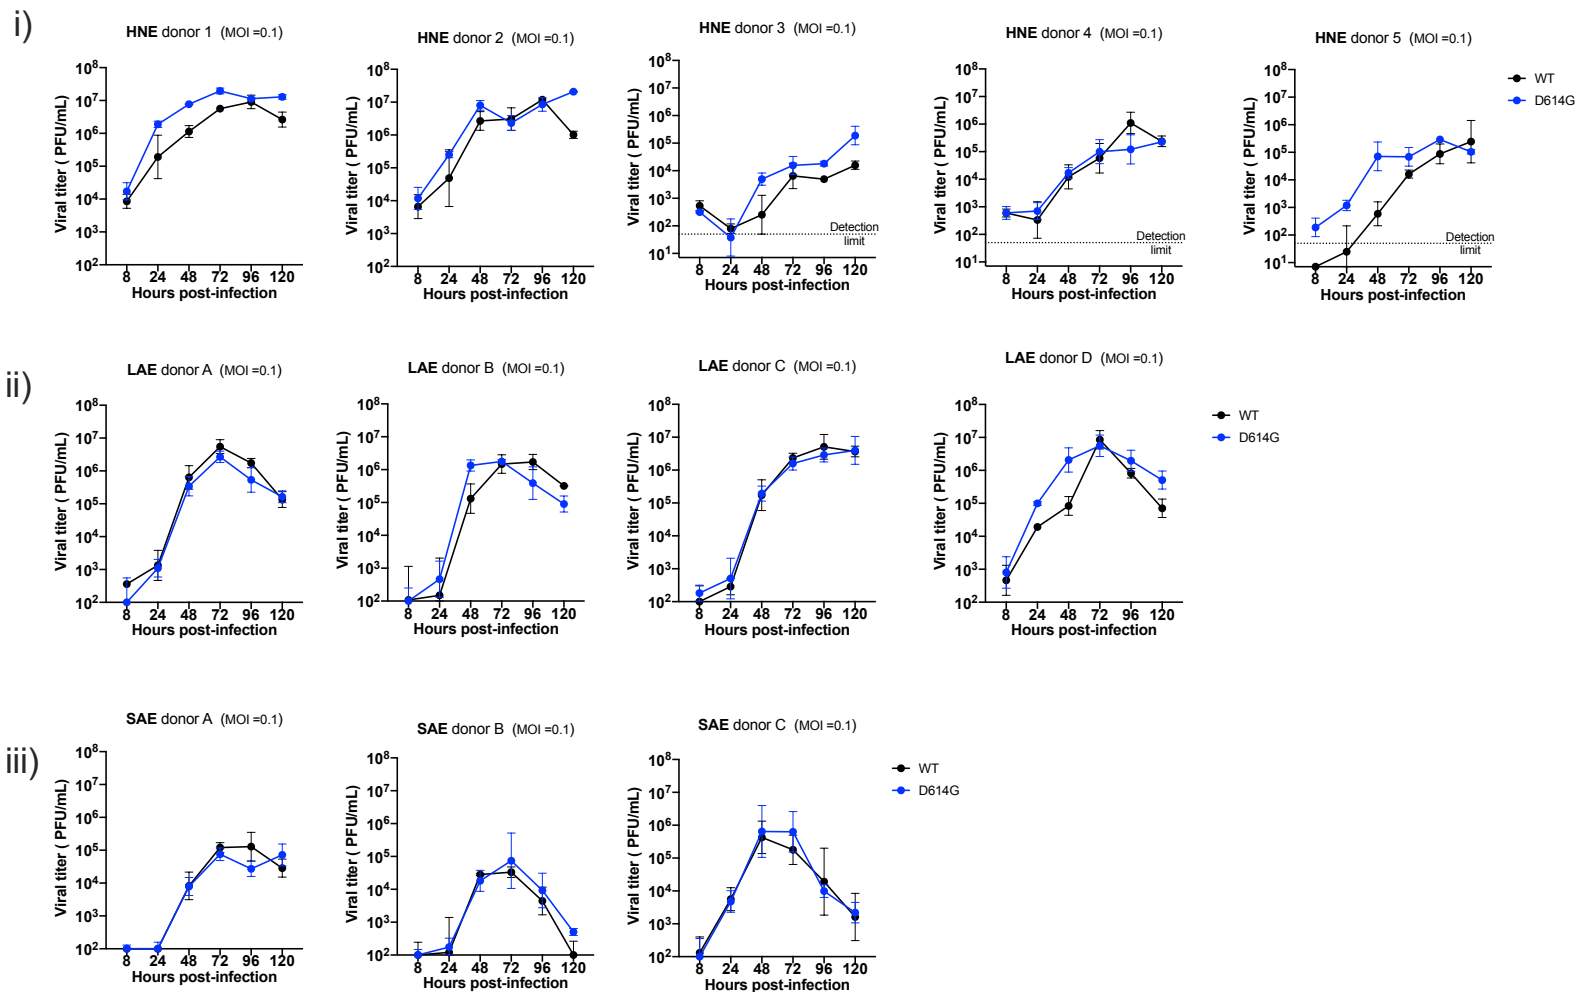

## B

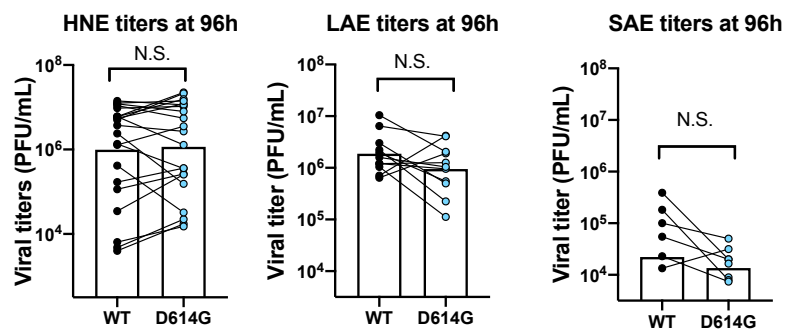

## C

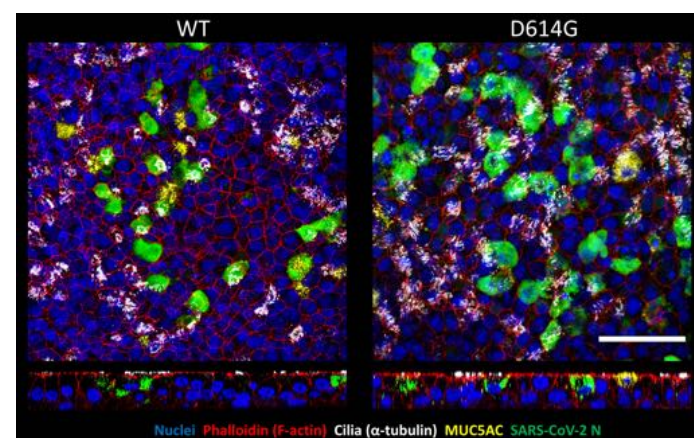

# Figure S2

## A

|                                        |   |   |   |   |   |   |   |   |   |
|----------------------------------------|---|---|---|---|---|---|---|---|---|
| Infected hamsters (Day post infection) | 0 | 1 | 2 | 3 | 4 | 5 | 6 | 7 | 8 |
| Exposed hamsters (Day post exposure)   | - | 0 | 1 | 2 | 3 | 4 | 5 | 6 | 7 |

 : nasal wash sampling  
 : nasal wash sampling

## B

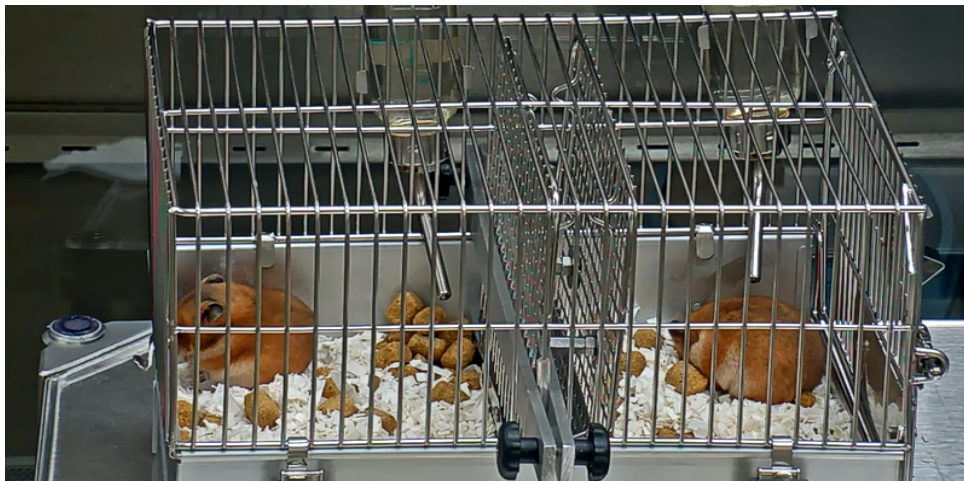

Supplement: NIHPP2020.09.28.317685-supplement-1.pdf [file NIHPP2020.09.28.317685-supplement-1.pdf]
